# Supplementary material for: Differences in Social Motivation in Children with Smith–Magenis Syndrome and Down Syndrome
Source: Springer Nature journal article supplement (doi:10.1007/s10803-016-2743-3), 2016-03-17
Supplement: MOESM5 [file 7823086]

Differences in social motivation in children with Smith-Magenis syndrome and Down syndrome. Journal of Autism and Developmental Disorders, Lucy Wilde1, Anna Mitchell, Chris Oliver. 1Cerebra Centre for Neurodevelopmental Disorders, School of Psychology, University of Birmingham, Birmingham, UK. l.v.wilde@bham.ac.uk

| Interactive adult | Smith-Magenis syndrome | Down syndrome | Significance of between group difference |
| --- | --- | --- | --- |
| Mother |  |  |  |
| Median  *Range* | 4.17  *(.00 – 11.33)* | 7.22  *(1.3-17.50)* |  |
| Unfamiliar adult |  |  |  |
| Median  *Range* | 4.67  *(.19-20.17)* | 9.26  *(2.69-18.88)* |  |
| Mother-unfamiliar adult difference |  |  |  |
| Median *Range* | -.17  *(-8.97-8.55)* | -1.02  *(-5.56-4.26)* | U = 174, *p* = .49, r = .11 |

Positive affect shown during high attention with interactive mothers and unfamiliar adults, the difference between these conditions (medians and range) and inferential analysis of between group differences
